# Supplementary material
Source: PubMed Central journal article supplement (PMC7612760)
Supplement: EMS145033-supplement-Table_S1.pdf [file EMS145033-supplement-Table_S1.pdf]

**Supplemental information**

**Structural basis for channel conduction  
in the pump-like channelrhodopsin ChRmine**

**Koichiro E. Kishi, Yoon Seok Kim, Masahiro Fukuda, Masatoshi Inoue, Tsukasa Kusakizako, Peter Y. Wang, Charu Ramakrishnan, Eamon F.X. Byrne, Elina Thadhani, Joseph M. Paggi, Toshiki E. Matsui, Keitaro Yamashita, Takashi Nagata, Masae Konno, Sean Quirin, Maisie Lo, Tyler Benster, Tomoko Uemura, Kehong Liu, Mikihiro Shibata, Norimichi Nomura, So Iwata, Osamu Nureki, Ron O. Dror, Keiichi Inoue, Karl Deisseroth, and Hideaki E. Kato**

**Table S1. Cryo-EM data collection and refinement statistics, Related to STAR Methods**

|                                                     | ChRmine<br>PDB: 7W9W<br>EMDB: EMD-32377 | ChRmine-Fab02<br>EMDB: EMD-32378 |
|-----------------------------------------------------|-----------------------------------------|----------------------------------|
| <b>Data collection and processing</b>               |                                         |                                  |
| Microscope                                          |                                         | Krios                            |
| Magnification                                       |                                         | 105,000                          |
| Voltage (kV)                                        |                                         | 300                              |
| Electron exposure (e <sup>-</sup> /Å <sup>2</sup> ) |                                         | 46                               |
| Defocus range (μm)                                  |                                         | 0.8 – 1.6                        |
| Pixel size at detector (Å/pixel)                    |                                         | 0.83                             |
| Symmetry imposed                                    |                                         | C3                               |
| Initial particle images (no.)                       |                                         | 2,958,159                        |
| Final particle images (no.)                         |                                         | 185,895                          |
| Map resolution (Å)                                  | 2.02                                    | 2.12                             |
| FSC threshold                                       | 0.143                                   | 0.143                            |
| Map sharpening <i>B</i> factor (Å <sup>2</sup> )    | -35.7                                   | -38.1                            |
| <b>Refinement</b>                                   |                                         |                                  |
| Initial model used (PDB code)                       | 3UG9                                    |                                  |
| Model composition (monomer)                         |                                         |                                  |
| Protein residues                                    | 2204                                    |                                  |
| Retinal                                             | 20                                      |                                  |
| Lipids                                              | 128                                     |                                  |
| Waters                                              | 48                                      |                                  |
| <i>B</i> factors (Å <sup>2</sup> )                  |                                         |                                  |
| Protein                                             | 58.4                                    |                                  |
| Retinal                                             | 46.8                                    |                                  |
| Lipids                                              | 109                                     |                                  |
| Water                                               | 52.9                                    |                                  |
| R.m.s. deviations                                   |                                         |                                  |
| Bond lengths (Å)                                    | 0.015                                   |                                  |
| Bond angles (°)                                     | 2.02                                    |                                  |
| Validation                                          |                                         |                                  |
| MolProbity score                                    | 0.85                                    |                                  |
| Clashscore                                          | 1.27                                    |                                  |
| Poor rotamers (%)                                   | 0.88                                    |                                  |
| Ramachandran plot                                   |                                         |                                  |
| Favored (%)                                         | 98.51                                   |                                  |
| Allowed (%)                                         | 1.49                                    |                                  |
| Outlier (%)                                         | 0                                       |                                  |
